# Supplementary material for: Comparative Assessment of Pixel and Object-Based Approaches for Mapping of Olive Tree Crowns Based on UAV Multispectral Imagery
Source: MDPI journal article supplement (doi:10.3390/rs14030757), 2022-02-06
Supplement: s1 [file s1]

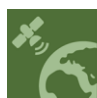

| ID | Class Name         | Value | Color | Count  |
|----|--------------------|-------|-------|--------|
| 1  | Young Olive Trees  | 1     |       | 564    |
| 2  | Old Olive Trees    | 12    |       | 842    |
| 3  | Older Olive Trees  | 83    |       | 440    |
| 4  | Oldest Olive Trees | 115   |       | 770    |
| 5  | Tile               | 2     |       | 3647   |
| 6  | Sheet Metal        | 62    |       | 3085   |
| 7  | Sheet Metal 2      | 76    |       | 340    |
| 8  | Asphalt            | 82    |       | 1551   |
| 9  | Concrete           | 152   |       | 2510   |
| 10 | Shadow             | 232   |       | 305    |
| 11 | High Vegetation    | 292   |       | 9226   |
| 12 | Macadam            | 442   |       | 1659   |
| 13 | Bare Stone         | 582   |       | 1791   |
| 14 | Quarry             | 792   |       | 2960   |
| 15 | Sea                | 814   |       | 698330 |
| 16 | Grass              | 840   |       | 3246   |
| 17 | Shrubby Vegetation | 992   |       | 323    |
| 18 | Brown soil         | 1067  |       | 1193   |

Supplement figure S1. Collected test samples

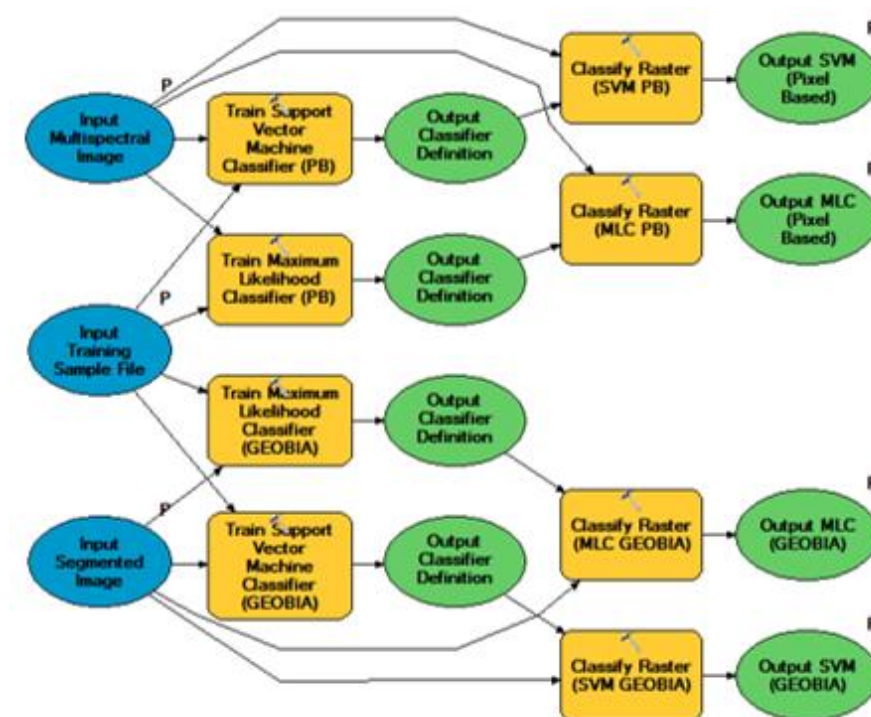

Supplement figure S2. PvO-ACP tool
